# Supplementary material
Source: Springer Nature journal article supplement (https://www.springermedizin.de/resource/supplementary/12936_2011_1765_MOESM3_ESM.pdf/9541676)

Standard Curve

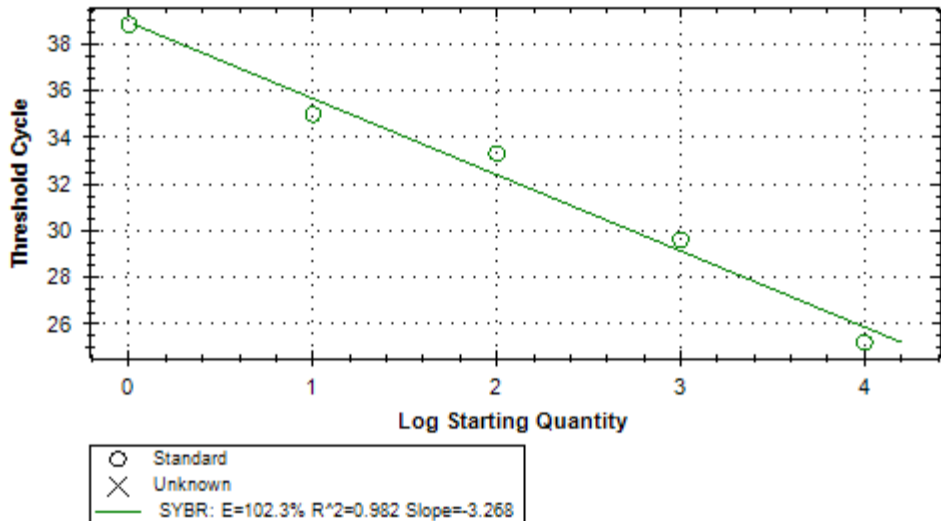

Supplement: MOESM3 [file 9541676]
